# Supplementary material
Source: PubMed Central journal article supplement (PMC6296241)
Supplement: NIHMS990308-supplement-1.pdf [file NIHMS990308-supplement-1.pdf]

**Supplemental Table 1**  
**Variable Estimates on Factors Proposed in the CFA Model**

|                                                         | Estimate (SE)  | p-value           |
|---------------------------------------------------------|----------------|-------------------|
| <b>Inclination to Activity</b>                          |                |                   |
| Physical Activity Enjoyment (Range: 3-12)               | 1 (0)          | NA                |
| Physical Activity Barriers (Range: 4-20)                | 0.99 (0.07)    | <.001             |
| Physical Activity Self-Efficacy (Range: 3-12)           | -1.073 (0.068) | <.001             |
| Physical Activity Self-Management (Range: 5-15)         | -1.227 (0.08)  | <.001             |
| BMI (z-score)                                           | 0.071 (0.023)  | .002              |
| Past Year Substance Use Frequency (Range: 3-15)         | 0.169 (0.037)  | <.001             |
| Depression (Range: 6-18)                                | 0.953 (0.072)  | <.001             |
| <b>Opportunities for Team Based Activity</b>            |                |                   |
| Activity Fee (Range: 1-3)                               | 1 (0)          | NA                |
| Availability of a Sport Bus (yes/no)                    | -2.064 (0.141) | <.001             |
| Distance to the Nearest Gym (kilometers)                | -0.154 (0.04)  | <.001             |
| Distance to the nearest Rec Center (kilometers)         | -0.411 (0.032) | <.001             |
| Participation on Sports Teams (count)                   | -0.731 (0.08)  | <.001             |
| <b>Opportunities for Exercise</b>                       |                |                   |
| Density of Parks near Home (percent)                    | 1 (0)          | NA                |
| Indoor Physical Education Facilities at School (count)  | -0.182 (0.132) | .166 <sup>a</sup> |
| Outdoor Physical Education Facilities at School (count) | 0.324 (0.094)  | .001              |
| Perceived Neighborhood daytime safety (Range: 1-4)      | -2.831 (0.14)  | <.001             |
| Perceived Neighborhood nighttime safety (Range: 1-4)    | -2.699 (0.134) | <.001             |
| Busy Streets in Neighborhood (count)                    | 0.259 (0.066)  | <.001             |
| Distance to the nearest Trail (kilometers)              | 0.021 (0.023)  | .345 <sup>a</sup> |
| Access Points (10 count)                                | -3.546 (0.176) | <.001             |
| Reported Neighborhood Crime (count)                     | -1.552 (0.084) | <.001             |
| Distance to School (kilometers)                         | 0.51 (0.039)   | <.001             |
| Home Physical Activity Equipment (Range 0:5)            | 1.065 (0.12)   | <.001             |

(continued on next page)

**Supplemental Table 1 (continued)**  
**Variable Estimates on Factors Proposed in the CFA Model**

|                                                              | Estimate (SE)  | p-value |
|--------------------------------------------------------------|----------------|---------|
| <b>Social Norms</b>                                          |                |         |
| Perceived Mother's PA (Range: 1-4)                           | 1 (0)          | NA      |
| Perceived Father's PA (Range: 1-4)                           | 0.891 (0.059)  | <.001   |
| Parent Self-Reported PA (hours/week)                         | 1.218 (0.19)   | <.001   |
| Parent Active with Child (hours/week)                        | 0.395 (0.077)  | <.001   |
| Family does Active Things (Range: 1-4)                       | 1.112 (0.059)  | <.001   |
| Family Support for Physical Activity (Range: 1-4)            | 1.305 (0.068)  | <.001   |
| Parent helps Child be Active (hours/week)                    | 1.077 (0.111)  | <.001   |
| Parent Talks to Child about being Active (Range: 1-5)        | 0.111 (0.054)  | .039    |
| Friends Play Sports (Range: 1-4)                             | 1.732 (0.085)  | <.001   |
| Friends think it is Important to be Active (Range: 1-4)      | 1.615 (0.079)  | <.001   |
| Friends are Active Together (Range: 1-4)                     | 1.571 (0.078)  | <.001   |
| Friend Self-Reported Physical Activity (hours/week)          | 1.085 (0.198)  | <.001   |
| School Physical Activity Promotion (Range: 1-5)              | 0.8 (0.058)    | <.001   |
| Average Physical Activity of Students in School (hours/week) | 0.161 (0.032)  | <.001   |
| <b>Degree of PE</b>                                          |                |         |
| Time spent in PA in an average week (hours/week)             | 1 (0)          | NA      |
| School's Required Physical Education Credits (credits/year)  | 0.054 (0.008)  | <.001   |
| Had gym class in the last year (yes/no)                      | 0.139 (0.033)  | <.001   |
| <b>Passive Entertainment</b>                                 |                |         |
| Video Games in Bedroom (yes/no)                              | 1 (0)          | NA      |
| TV in Bedroom (yes/no)                                       | 1.089 (0.059)  | <.001   |
| Screen Time (hours/day)                                      | -1.51 (0.115)  | <.001   |
| Parent watches TV with Child (hours/week)                    | -0.48 (0.059)  | <.001   |
| Parent TV hours (hours/week)                                 | -4.22 (0.312)  | <.001   |
| Home Media Equipment (count)                                 | -1.231 (0.104) | <.001   |

**Note.**

a: p-values > .05 indicate that the variable does not load well onto the proposed factor

**Supplemental Table 2**  
**Factor Loadings from the 8-factor EFA Solution Using Oblimin Rotation**

|                                                         | Factor 1 | Factor 2 | Factor 3 | Factor 4 | Factor 5 | Factor 6 | Factor 7 | Factor 8 | Factor Loading from Geomin Rotation |
|---------------------------------------------------------|----------|----------|----------|----------|----------|----------|----------|----------|-------------------------------------|
| <b>Factor 1</b>                                         |          |          |          |          |          |          |          |          |                                     |
| Physical Activity Enjoyment (Range: 3-12)               | -0.324   | 0.186    | -0.123   | -0.027   | -0.034   | -0.032   | 0.027    | 0.036    | 1: Personal/Social                  |
| Physical Activity Self-Efficacy (Range: 3-12)           | 0.381    | 0        | 0.161    | 0.012    | 0.022    | 0.002    | -0.061   | 0.064    | 1: Personal/Social                  |
| Physical Activity Self-Management (Range: 5-15)         | 0.403    | 0.101    | 0.177    | 0.048    | 0.041    | -0.015   | -0.017   | 0.007    | 1: Personal/Social                  |
| Participation on Sports Teams (count)                   | 0.323    | -0.056   | 0.152    | -0.092   | 0.054    | 0.076    | -0.015   | 0.028    | 1: Personal/Social                  |
| Family does Active Things (Range: 1-4)                  | 0.32     | -0.157   | 0.317    | 0.197    | -0.162   | 0.011    | 0.01     | -0.119   | 1: Personal/Social                  |
| Family Support for Physical Activity (Range: 1-4)       | 0.434    | -0.162   | 0.3      | 0.058    | -0.043   | 0.106    | -0.043   | -0.026   | 1: Personal/Social                  |
| Friends Play Sports (Range: 1-4)                        | 0.831    | 0.028    | -0.079   | -0.095   | 0.018    | -0.015   | 0.005    | 0.01     | 1: Personal/Social                  |
| Friends think it is Important to be Active (Range: 1-4) | 0.797    | 0.038    | -0.083   | 0.016    | 0.022    | -0.022   | 0.028    | -0.035   | 1: Personal/Social                  |
| Friends are Active Together (Range: 1-4)                | 0.704    | 0.007    | 0.025    | -0.013   | -0.044   | -0.023   | -0.007   | 0.032    | 1: Personal/Social                  |
| <b>Factor 2</b>                                         |          |          |          |          |          |          |          |          |                                     |
| Physical Activity Barriers (Range: 4-20)                | -0.199   | 0.233    | -0.086   | 0.109    | 0.013    | 0.017    | 0.052    | 0.064    | 1: Personal/Social                  |
| BMI (z-score)                                           | -0.054   | 0.143    | 0.097    | -0.08    | 0.004    | -0.048   | 0.032    | -0.011   | 2: Personal 2                       |
| Depression (Range: 6-18)                                | -0.191   | 0.3      | -0.087   | 0.031    | 0.113    | -0.014   | 0.003    | 0.114    | 2: Personal 2                       |
| Perceived Neighborhood daytime safety (Range: 1-4)      | 0.016    | 0.872    | -0.001   | 0.018    | -0.034   | -0.006   | -0.01    | -0.039   | 2: Personal 2                       |
| Perceived Neighborhood nighttime safety (Range: 1-4)    | 0.031    | 0.889    | 0.028    | -0.004   | -0.02    | 0.013    | -0.003   | -0.005   | 2: Personal 2                       |
| <b>Factor 3</b>                                         |          |          |          |          |          |          |          |          |                                     |
| Perceived Mother's PA (Range: 1-4)                      | 0.235    | -0.148   | 0.316    | 0.16     | -0.076   | 0.039    | -0.008   | 0.038    | 1: Personal/Social                  |
| Perceived Father's PA (Range: 1-4)                      | 0.229    | -0.082   | 0.276    | 0.156    | -0.053   | 0.112    | 0.032    | 0.035    | 1: Personal/Social                  |
| Parent Self-Reported PA (hours/week)                    | -0.105   | -0.008   | 0.491    | -0.051   | 0.037    | -0.001   | -0.034   | 0.035    | 3: Parent                           |
| Parent Active with Child (hours/week)                   | -0.156   | 0.052    | 0.609    | -0.075   | -0.046   | -0.096   | 0.041    | -0.087   | 3: Parent                           |
| Parent helps Child be Active (hours/week)               | 0.029    | 0.045    | 0.579    | -0.121   | 0.044    | 0.045    | -0.03    | 0.039    | 3: Parent                           |
| Parent Talks to Child about being Active (Range: 1-5)   | -0.065   | 0.096    | 0.271    | -0.006   | -0.098   | -0.05    | 0.066    | -0.067   | 3: Parent                           |
| Parent watches TV with Child (hours/week)               | -0.118   | 0.063    | 0.304    | -0.198   | -0.037   | -0.044   | 0.038    | -0.007   | 3: Parent                           |
| <b>Factor 4</b>                                         |          |          |          |          |          |          |          |          |                                     |
| Video Games in Bedroom (yes/no)                         | -0.078   | 0.056    | -0.033   | 0.792    | 0.038    | -0.006   | -0.048   | -0.004   | 4: Sedentary Behavior               |
| TV in Bedroom (yes/no)                                  | -0.005   | -0.009   | -0.026   | 0.904    | -0.056   | -0.02    | -0.011   | -0.013   | 4: Sedentary Behavior               |
| Screen Time (hours/day)                                 | -0.062   | 0.082    | -0.074   | -0.334   | -0.004   | 0.018    | 0.038    | 0.024    | 4: Sedentary Behavior               |
| Parent TV hours (hours/week)                            | -0.038   | 0.072    | 0.056    | -0.366   | -0.015   | -0.034   | -0.015   | 0.019    | 4: Sedentary Behavior               |
| Home Media Equipment (count)                            | 0.021    | 0.096    | 0.071    | -0.321   | 0.044    | 0.09     | -0.119   | 0.282    | 4: Sedentary Behavior               |

(continued on next page)

**Supplemental Table 2 (continued)**  
**Factor Loadings from the 8-factor EFA Solution Using Oblimin Rotation**

|                                                              | Factor 1 | Factor 2 | Factor 3 | Factor 4 | Factor 5 | Factor 6 | Factor 7 | Factor 8 | Factor Loading from Geomin Rotation |
|--------------------------------------------------------------|----------|----------|----------|----------|----------|----------|----------|----------|-------------------------------------|
| <b>Factor 5</b>                                              |          |          |          |          |          |          |          |          |                                     |
| Availability of a Sport Bus (yes/no)                         | 0.009    | 0.051    | 0.041    | 0.049    | -1.023   | 0.074    | 0.012    | 0.13     | 5: School 1                         |
| Indoor Physical Education Facilities at School (count)       | -0.006   | 0.015    | 0.024    | 0.106    | 0.624    | 0.42     | -0.012   | 0.187    | 5: School 1                         |
| Outdoor Physical Education Facilities at School (count)      | 0.043    | 0.029    | 0.095    | 0.144    | 0.555    | -0.07    | 0.344    | 0.278    | 5: School 1                         |
| Average Physical Activity of Students in School (hours/week) | 0.065    | 0.017    | 0.037    | 0.076    | 0.4      | 0.109    | -0.08    | 0.386    | 5: School 1                         |
| Time spent in PA in an average week (hours/week)             | 0.008    | 0.017    | -0.016   | -0.023   | 0.545    | -0.093   | -0.178   | -0.078   | 5: School 1                         |
| <b>Factor 6</b>                                              |          |          |          |          |          |          |          |          |                                     |
| Activity Fee (Range: 1-3)                                    | 0.002    | 0.009    | -0.007   | 0.053    | 0.35     | 0.519    | 0.299    | -0.152   | 6: School 2                         |
| Distance to the nearest Trail (kilometers)                   | -0.024   | -0.013   | -0.107   | -0.079   | -0.231   | 0.275    | -0.118   | -0.009   | 5: School 1                         |
| School's Required Physical Education Credits (credits/year)  | 0.02     | 0.006    | 0.008    | 0.053    | 0.167    | -0.808   | 0.086    | 0.041    | 6: School 2                         |
| Had gym class in the last year (yes/no)                      | 0.001    | 0.008    | 0.117    | -0.088   | 0.054    | -0.2     | -0.12    | -0.13    | 6: School 2                         |
| <b>Factor 7</b>                                              |          |          |          |          |          |          |          |          |                                     |
| Past Year Substance Use Frequency (Range: 3-15)              | -0.052   | 0.027    | -0.051   | -0.072   | 0.109    | 0.056    | -0.16    | 0.039    | 7: Environment 1                    |
| Busy Streets in Neighborhood (count)                         | 0.017    | -0.025   | -0.004   | -0.076   | -0.04    | -0.063   | 0.732    | -0.02    | 7: Environment 1                    |
| <b>Factor 8</b>                                              |          |          |          |          |          |          |          |          |                                     |
| Distance to the Nearest Gym (kilometers)                     | 0.011    | 0.046    | -0.033   | 0.018    | 0.089    | -0.131   | -0.288   | 0.338    | 8: Environment 2                    |
| Distance to the nearest Rec Center (kilometers)              | -0.03    | -0.123   | -0.078   | -0.078   | -0.201   | 0.155    | 0.294    | 0.381    | 7: Environment 1                    |
| Density of Parks near Home (percent)                         | -0.02    | -0.084   | 0.022    | -0.024   | -0.051   | -0.036   | -0.05    | 0.431    | 8: Environment 2                    |
| Access Points (10 count)                                     | 0        | 0.108    | 0.033    | 0.029    | 0.128    | 0.066    | -0.089   | -0.726   | 7: Environment 1                    |
| Reported Neighborhood Crime (count)                          | 0.012    | 0.139    | 0.001    | 0.005    | -0.074   | 0.027    | 0.26     | -0.588   | 8: Environment 2                    |
| Distance to School (kilometers)                              | 0.028    | 0.028    | 0.005    | 0.048    | -0.166   | 0.089    | 0.159    | 0.418    | 7: Environment 1                    |
| Home Physical Activity Equipment (Range 0:5)                 | 0.092    | 0.003    | 0.209    | -0.124   | 0.015    | 0.108    | -0.1     | 0.236    | 8: Environment 2                    |
| Friend Self-Reported Physical Activity (hours/week)          | 0.147    | -0.011   | -0.047   | -0.082   | 0.12     | 0.084    | -0.015   | 0.148    | 1: Personal/Social                  |
| School Physical Activity Promotion (Range: 1-5)              | 0.031    | 0.05     | 0.089    | 0.119    | -0.335   | -0.125   | 0.075    | 0.469    | 7: Environment 1                    |
